# Supplementary material
Source: publisher site journal article supplement (https://www.dovepress.com/get_supplementary_file.php?f=403370.docx)
Supplement: Supplementary file 1 [file get_supplementary_file.php]

**Supplementary Material**

**Comprehensive analysis of NABP2 as a prognostic biomarker and its correlation with immune infiltration in hepatocellular carcinoma**

**Bowen Li, Jinghang Liu, Liangzhi Xu, Qi Xu, Zhaohui Liu, Tiande Liu***

***Correspondence****:** Tiande Liu. Departments of General Surgery, Second Affiliated Hospital of Nanchang University, Nanchang 330000, Jiangxi Province, China.

Email: [liutd123@163.com](mailto:liutd123@163.com)

Tel: +8613479101447


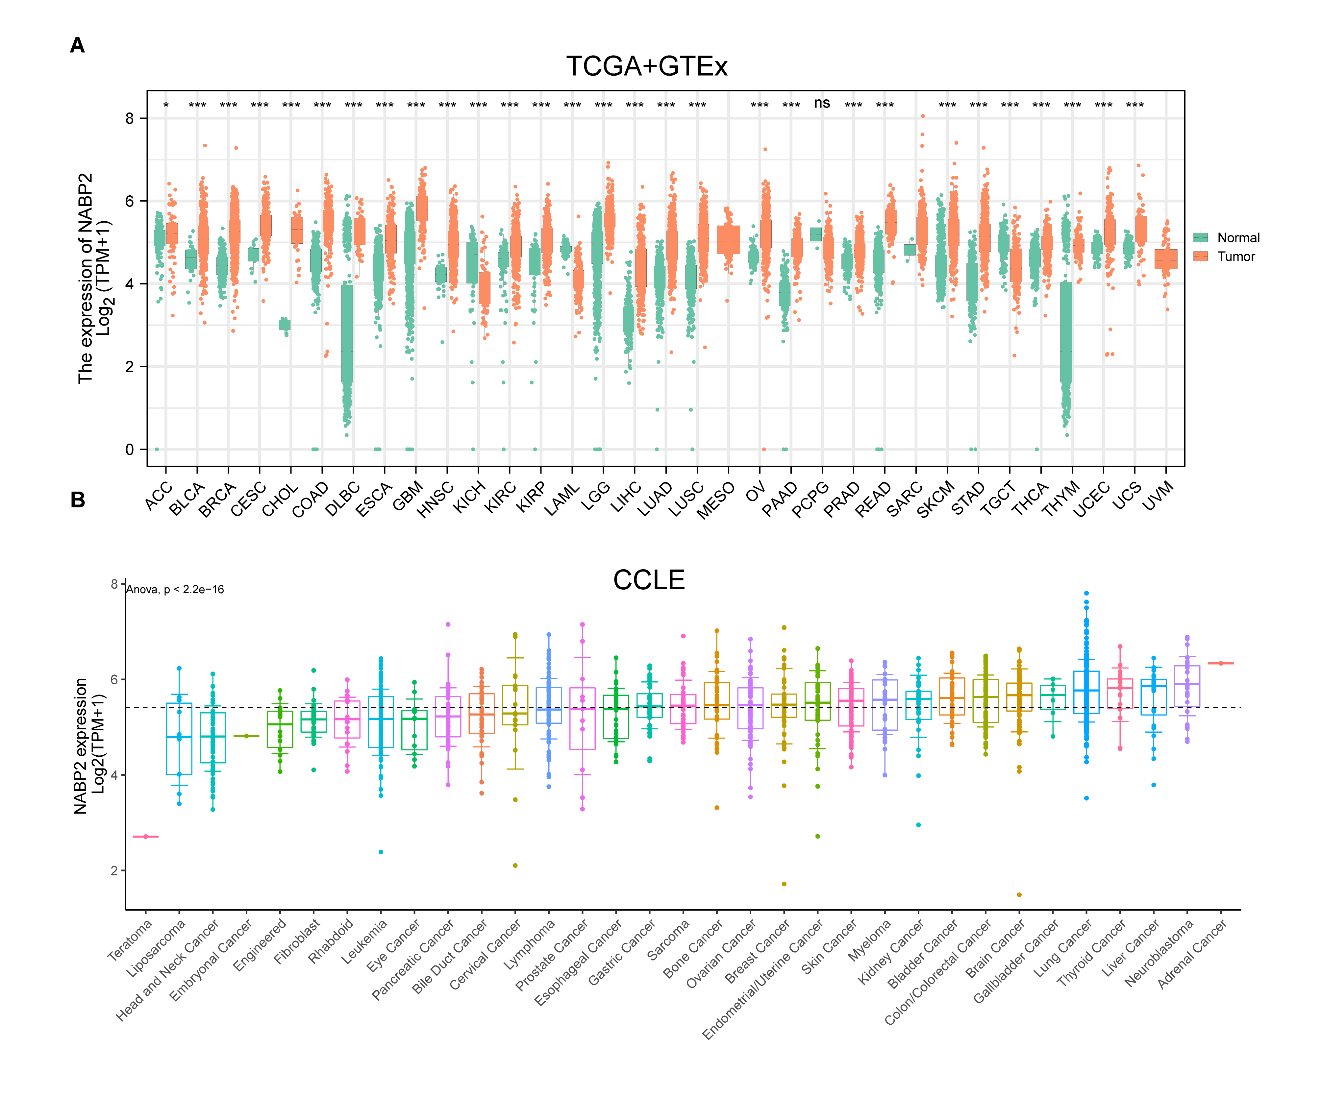


**Supplementary Figure S1 |** NABP2 expression level in various types of cancer tissues and tumor cells based on the TCGA&GTEx(**S1A**) and CCLE(**S1B**). (**p* value < 0.05; ***p* value < 0.01; ****p* value < 0.001;  **Abbreviations**: **ns,** no significance).

**
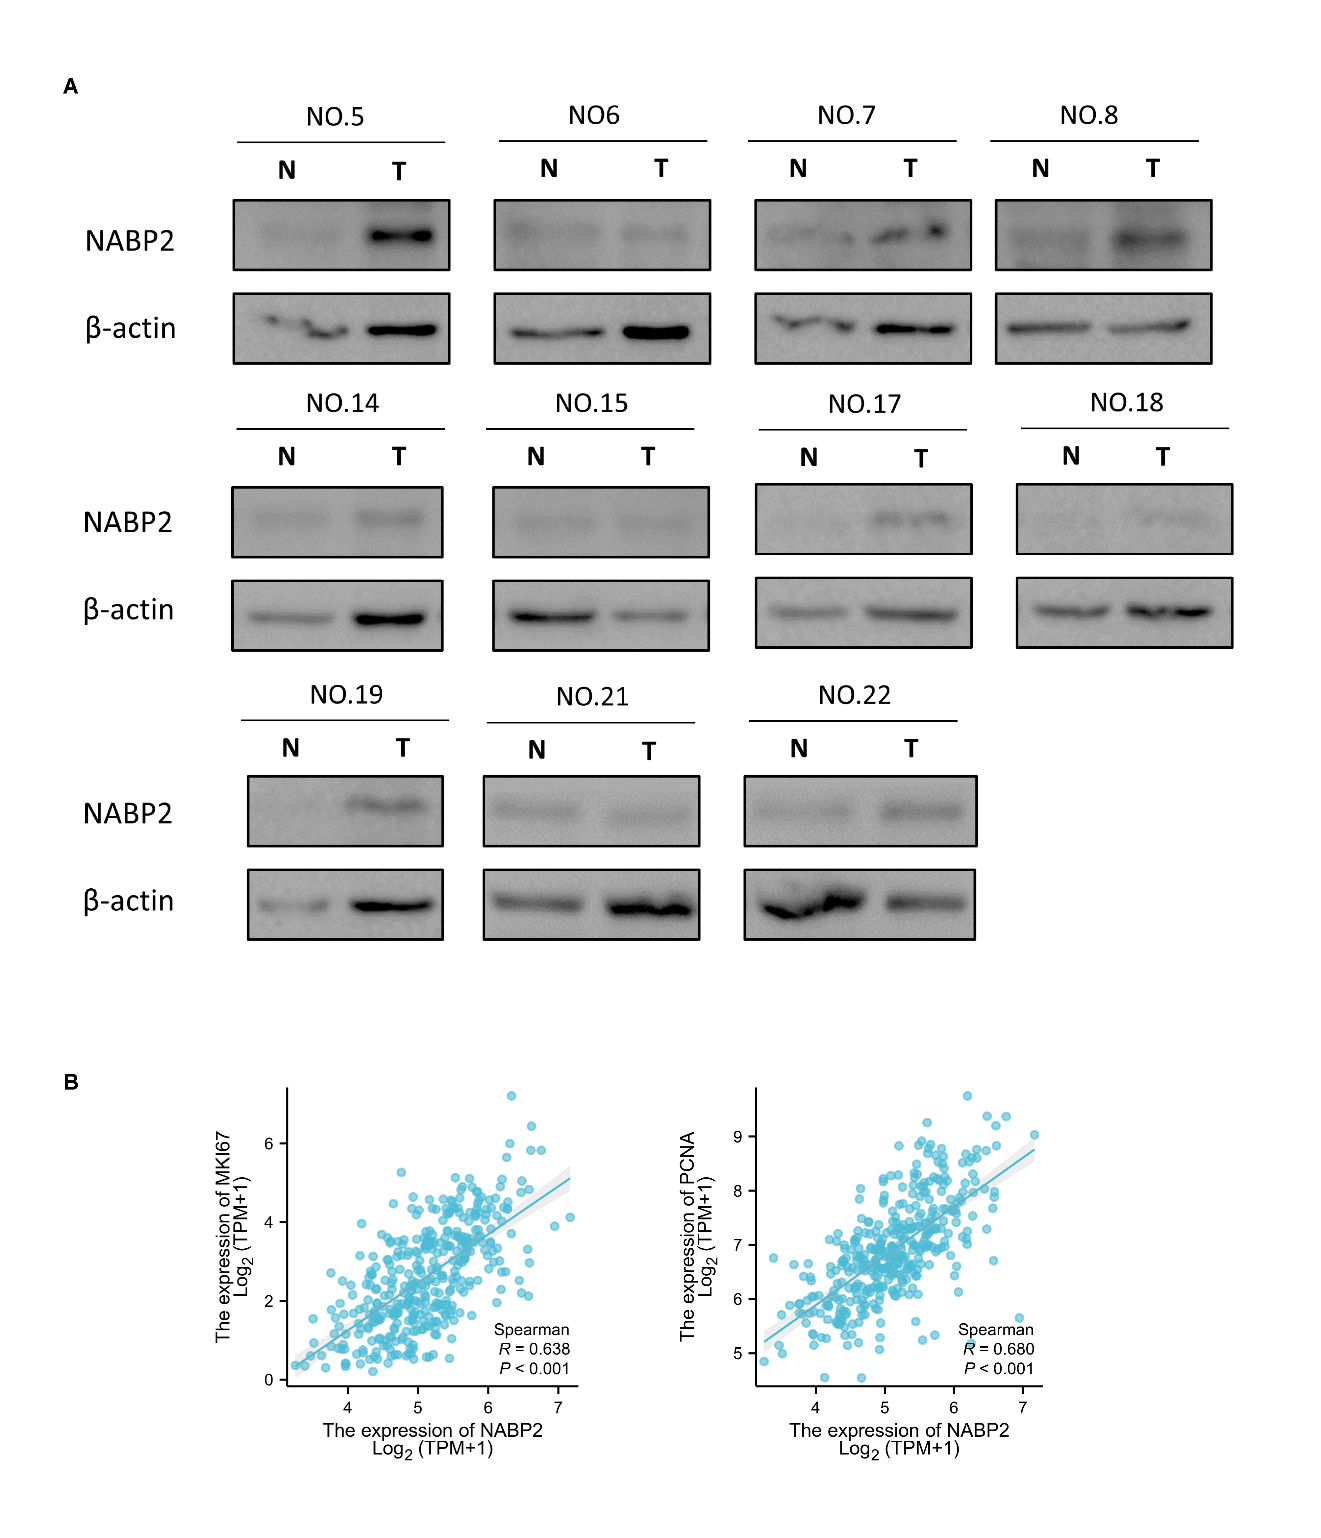
 Supplementary Figure S2 |** Western blot for further validation of the different protein expression of NABP2 between liver cancer tissues and paired adjacent normal tissues **(S2A).** Correlation between expression of NABP2 and proliferation markers ki67 and PCNA in HCC **(S2B).**


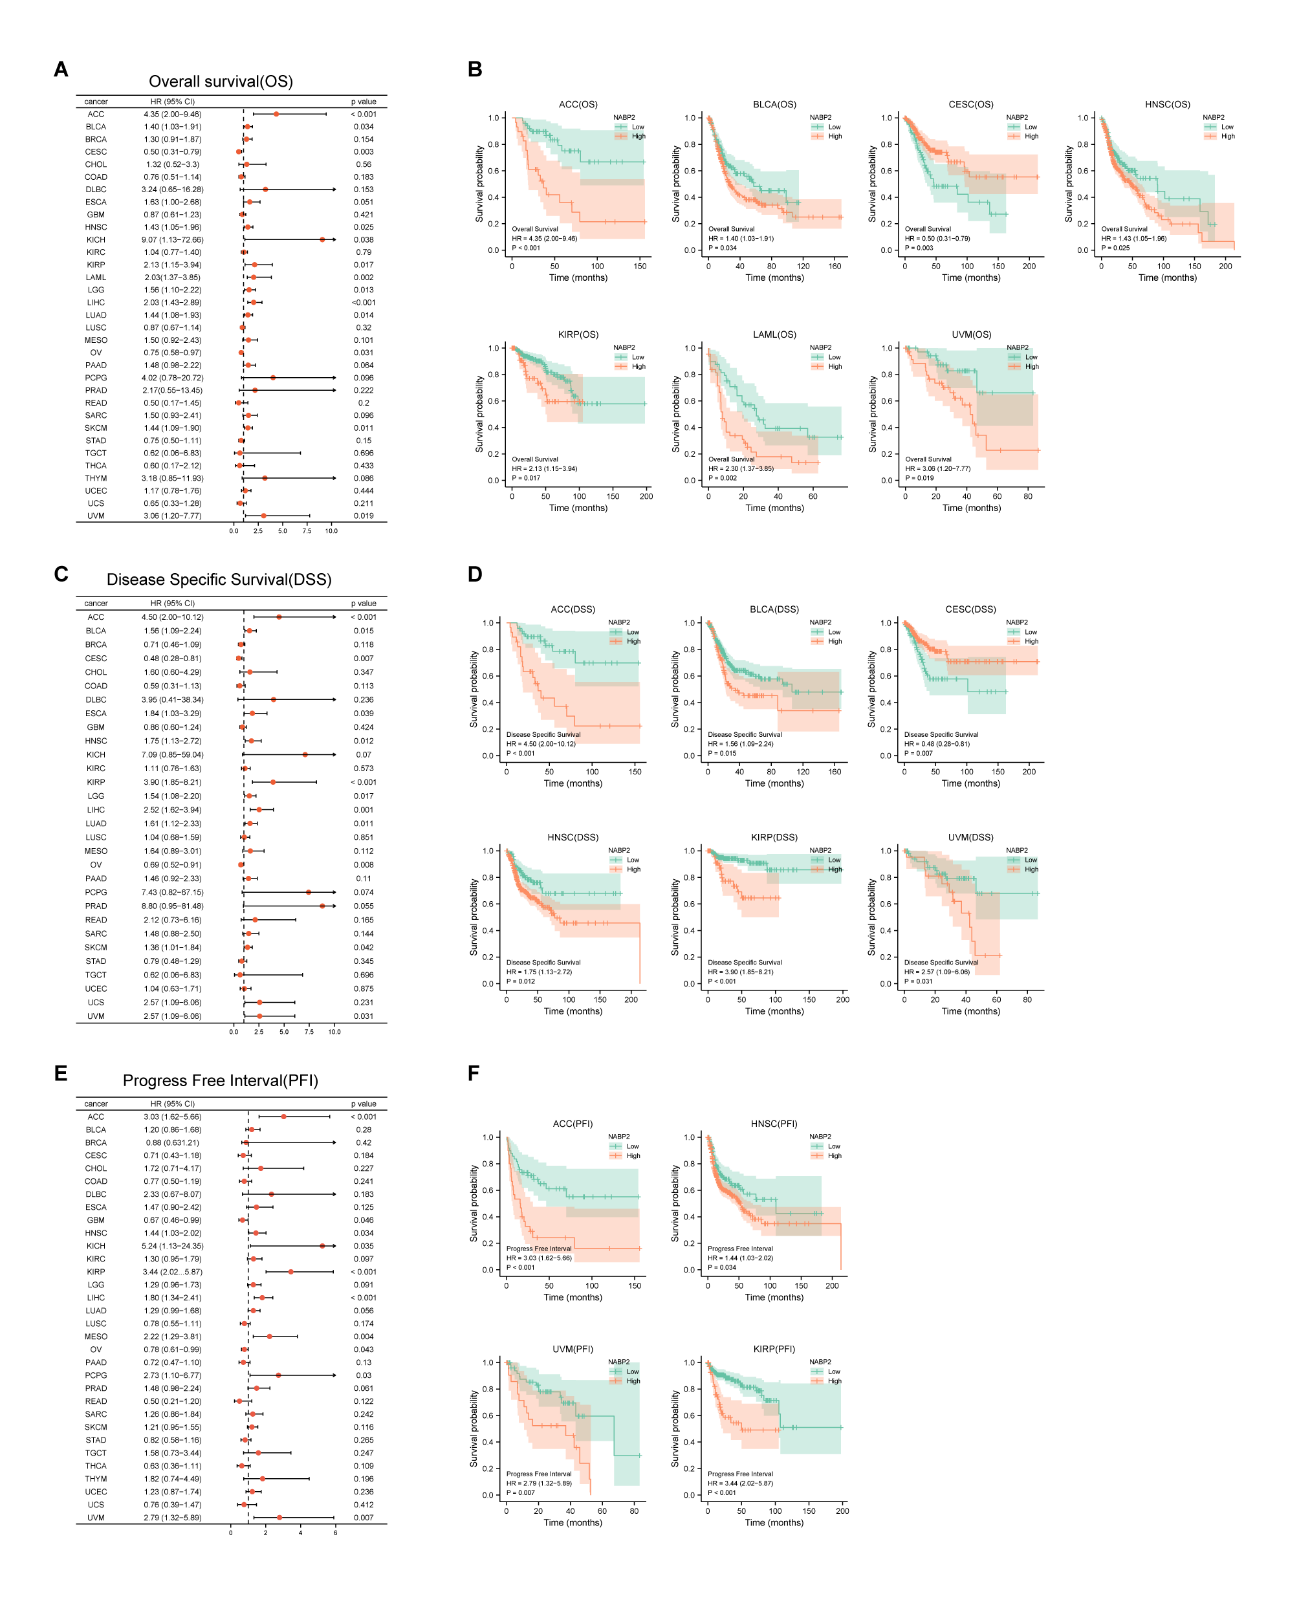


**Supplementary Figure S3 |** Survival analysis of NABP2 in pan-cancer. **(S3A)** Forest maps based on cox regression analysis for overall survival (OS) in pan-cancer from TCGA database. (**S3B**) Kaplan-Meier survival analysis of the association between NABP2 expression and OS in curves of OS in ACC, BLCA, CESC, HNSC, KIRP, LAML, and UVM. **(S3C)** Forest maps based on cox regression analysis for Disease-Specific Survival (DSS) in pan-cancer. **(S3D)** Survival curves of DSS in ACC, BLCA, CESC, HNSC, KIRP, and UVM patients. **(S3E)** Forest maps based on cox regression analysis for Progress Free Interval (PFI)in pan-cancer. **(S3F)** Kaplan-Meier survival curves of PFI in ACC, HNSC, KIRP, and UVM patients.


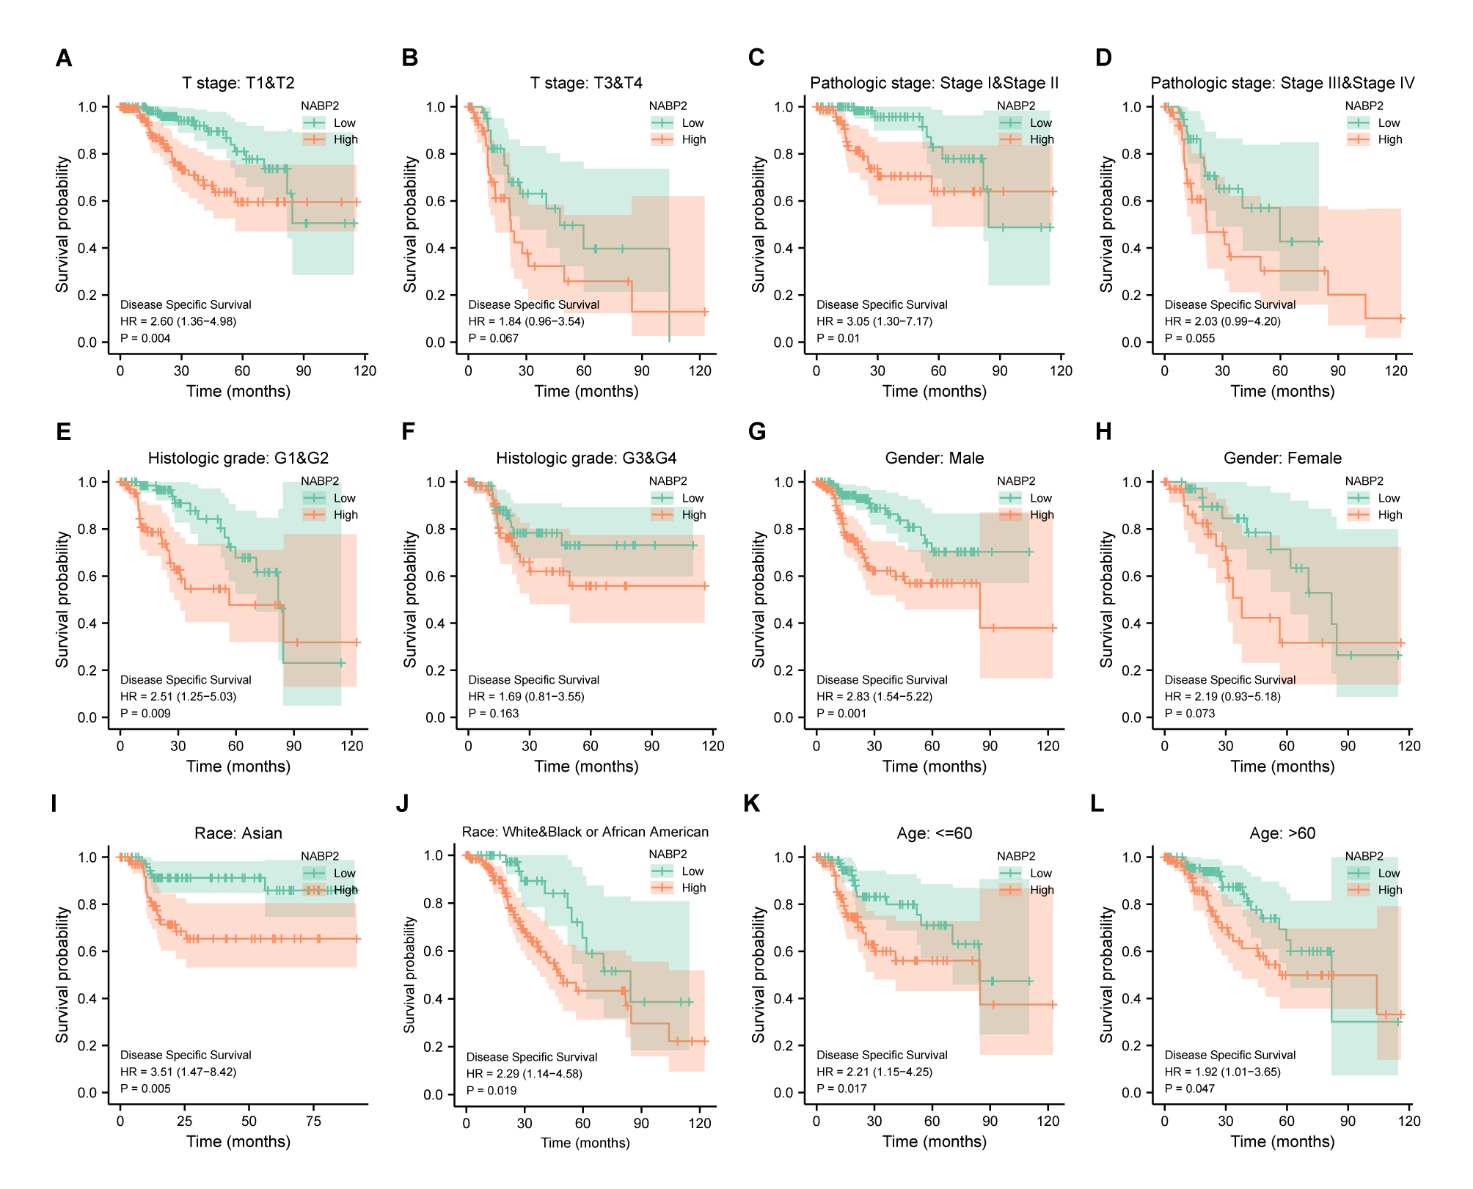


**Supplementary Figure S4** | Subgroup survival analysis for Disease-Specific Survival (DSS) in HCC based on a variety of clinicopathological factors**. (S4A-B)** T Stage; **(S4C-D)** Pathological stage;**(S4E-F)** Histologic grade;**(S4G-H)** Gender;**(S4I-J)** Race;**(S4K-L)** Age.


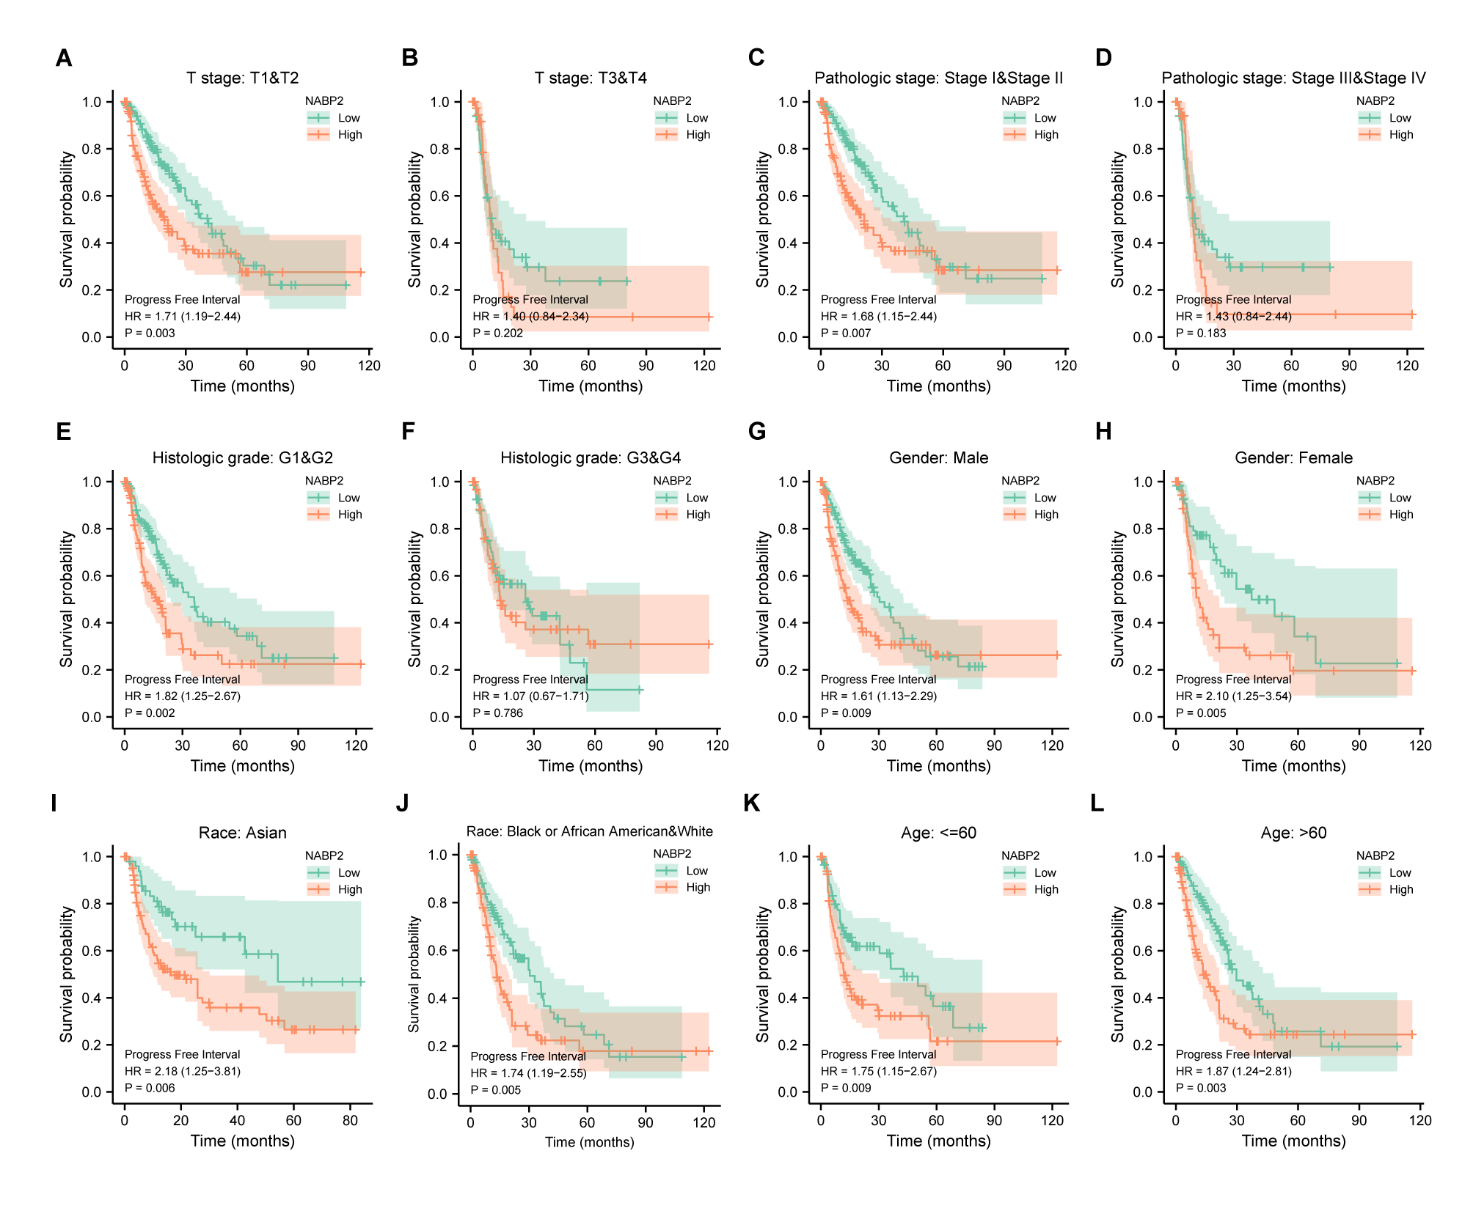


**Supplementary Figure S5** | Subgroup survival analysis for Progress Free Interval (PFI) in HCC based on a variety of clinicopathological factors**. (S5A-B)** T Stage; **(S5C-D)** Pathological stage;**(S5E-F)** Histologic grade;**(S5G-H)** Gender;**(S5I-J)** Race;**(S5K-L)** Age.


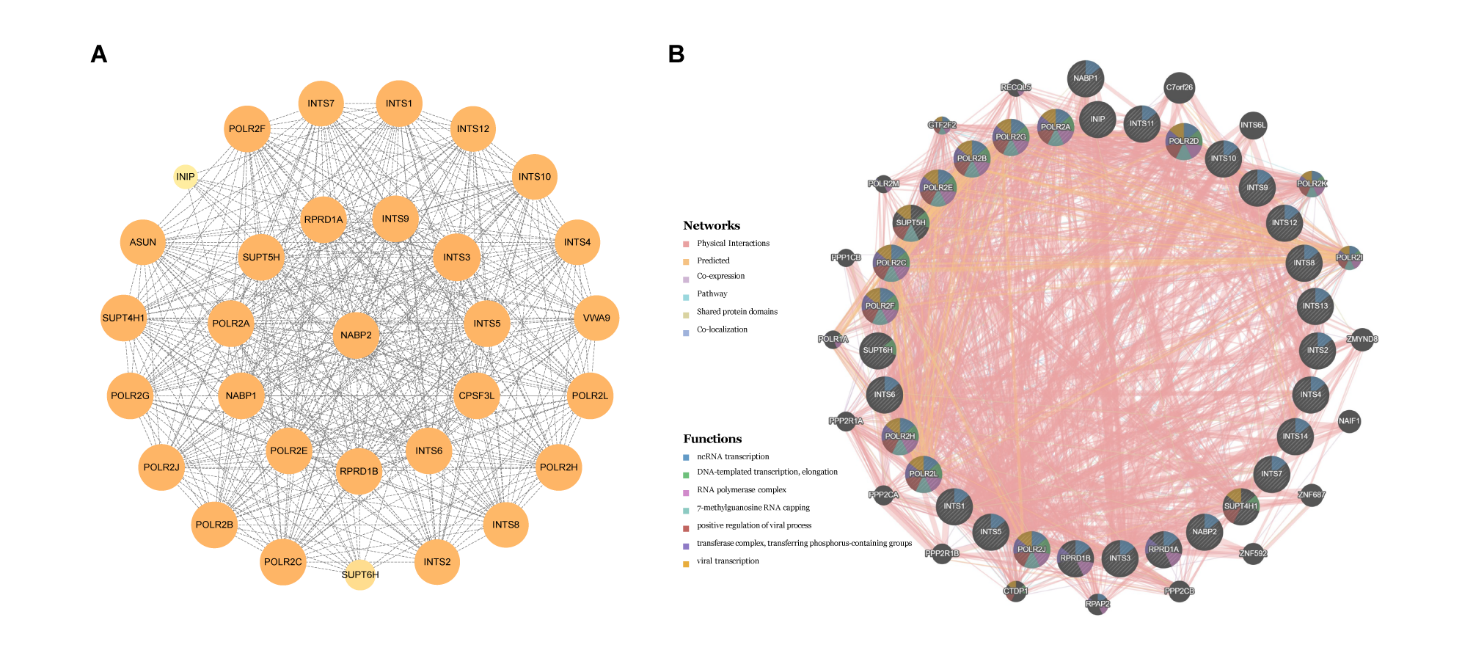


**Supplementary Figure S6** | Protein-protein interaction networks. **(S6A)** Protein-protein interaction (PPI) networks of NABP2 combined STRING and Cytoscape. (**S6B**). Protein-protein interaction and functional networks of NABP2 correlated genes in GeneMANIA.


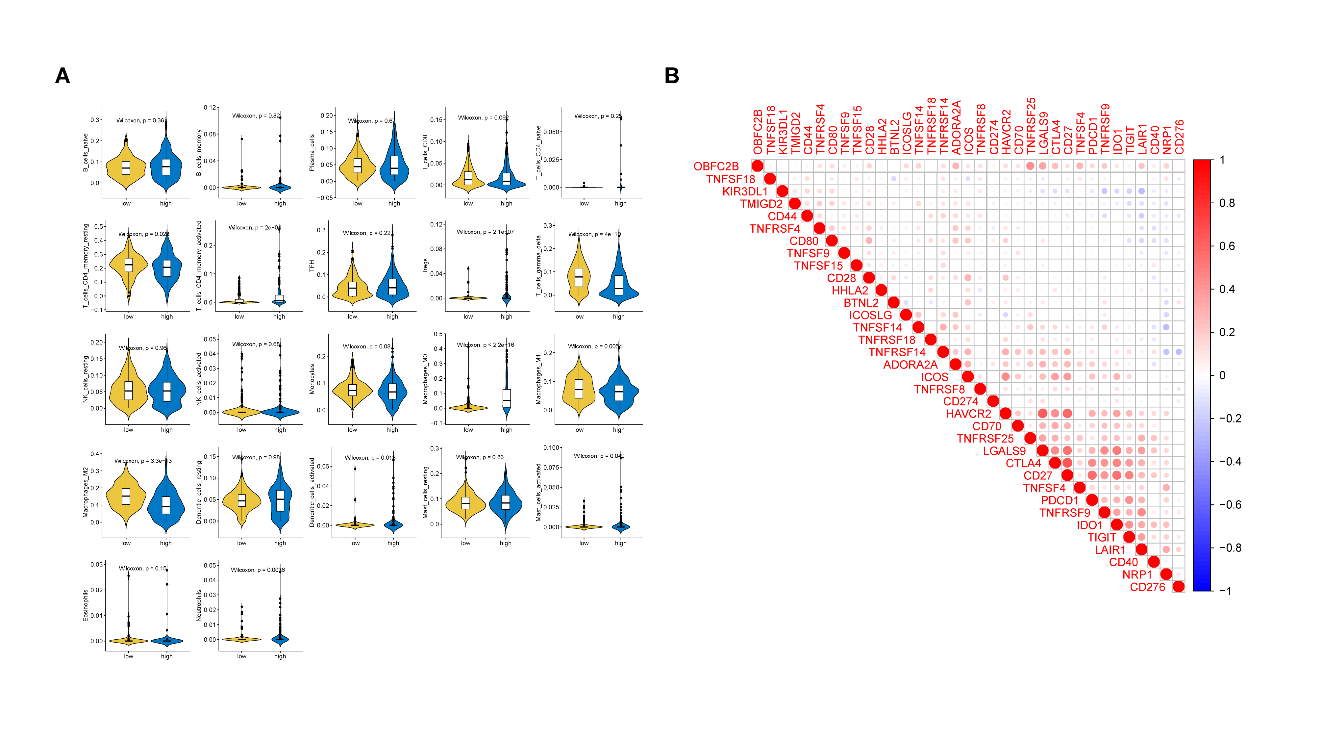


**Supplementary Figure S7** |The immune analysis of NABP2 in liver cancer based on the data from GEO dataset GSE37376.**(S7A)** Different enrichment scores of immune cells between NABP2-high and -low patients. **(S7B)** Correlation between immune checkpoints and NABP2 expression in HCC.


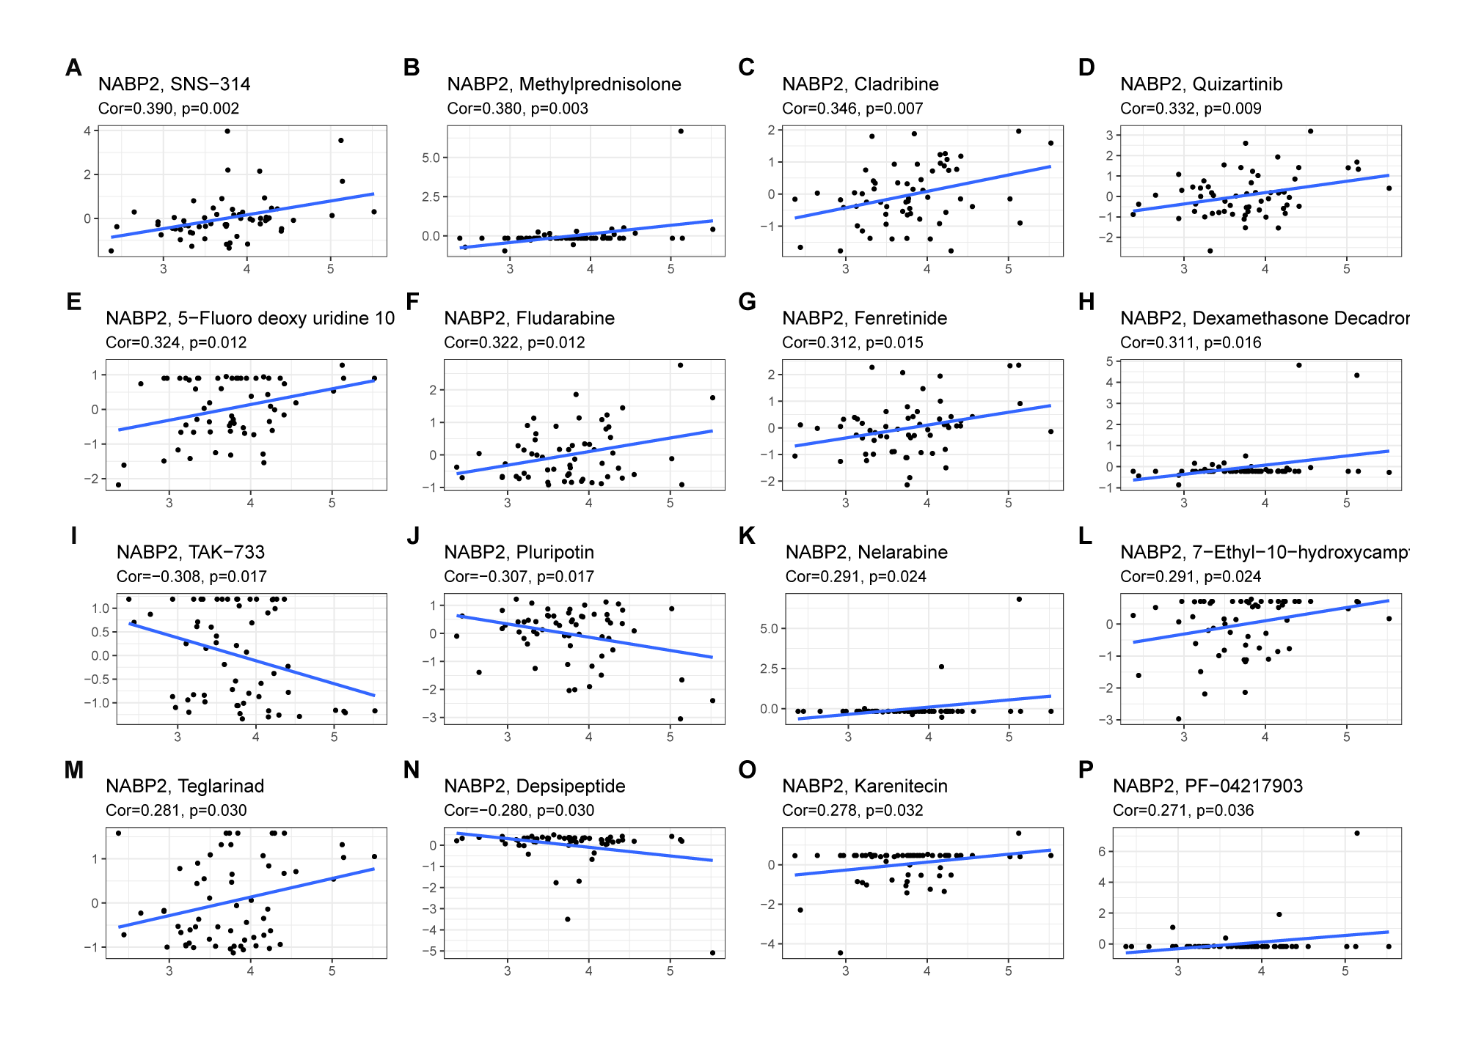


**Supplementary Figure S8** | Relationship between NABP2 expression and sensitivity to multiple drugs**.** **(S8A)** SNS-314, **(S8B)** Methylprednisolone, **(S8C)** Cladribine, **(S8D)** Quizartinib, **(S8E)** 5-Fluoro deoxy uridine 10mer, **(S8F)** Fludarabine, **(S8G)** Fenretinide, **(S8H)** Dexamethasone Decadron, **(S8I)** TAK-833, **(S8J)** Pluripotin, **(S8K)** Nelarabine, **(S8L)** 7-Ethyl-10-hydroxycamptothecin, **(S8M)** Teglarinad, **(S8N)** Depsipeptide, **(S8O)**  Karenitecin, and **(S8P)**PF-04217903.

**Supplementary Table S1 |** The statistical details of the transcriptional expression of NABP2 in HCC and normal liver tissues from TCGA and GEO datasets.

| **Dataset** | **P-value** | **Type** | **Nums** | **Min. value** | **Max. value** | **Median** | **IQR** | **Mean** | **SD** | **SE** |
| --- | --- | --- | --- | --- | --- | --- | --- | --- | --- | --- |
| **TCGA** | <0.001 | non-tumor | 50 | 2.731 | 4.531 | 3.482 | 0.452 | 3.513 | 0.38 | 0.054 |
| Tumor | 50 | 3.154 | 6.474 | 4.899 | 0.713 | 4.887 | 0.71 | 0.1 |
| **GSE76427** | <0.001 | non-tumor | 52 | 180.78 | 488.1 | 296.97 | 65.69 | 306.422 | 68.179 | 9.455 |
| tumor | 115 | 214.03 | 1134.16 | 446.32 | 186.975 | 461.159 | 156.223 | 14.568 |
| **GSE112790** | <0.001 | non-tumor | 15 | 4.884 | 6.109 | 5.697 | 0.495 | 5.571 | 0.347 | 0.09 |
| tumor | 183 | 5.396 | 8.337 | 6.53 | 0.672 | 6.555 | 0.531 | 0.039 |
| **GSE25097** | <0.001 | non-tumor | 243 | 0.076 | 1.085 | 0.617 | 0.239 | 0.596 | 0.187 | 0.012 |
| tumor | 268 | 0.147 | 2.653 | 1.004 | 0.569 | 1.087 | 0.473 | 0.029 |
| **GSE14520**  **(GPL3921 subset)** | <0.001 | non-tumor | 220 | 3.188 | 5.084 | 3.958 | 0.282 | 3.982 | 0.258 | 0.017 |
| tumor | 225 | 3.334 | 6.444 | 4.501 | 0.702 | 4.571 | 0.567 | 0.038 |
| **GSE22058**  **(GPL6793 subset)** | <0.001 | non-tumor | 97 | 145.158 | 525.105 | 357.001 | 99.421 | 354.829 | 81.049 | 8.229 |
| tumor | 100 | 215.426 | 1256.742 | 597.39 | 319.442 | 650.717 | 219.706 | 21.971 |
| **GSE36376** | <0.001 | non-tumor | 193 | 6.246 | 8.283 | 7.136 | 0.333 | 7.116 | 0.276 | 0.02 |
| tumor | 240 | 6.5 | 9.697 | 8.122 | 0.647 | 8.163 | 0.545 | 0.035 |
| **GSE63898** | <0.001 | non-tumor | 168 | 5.019 | 6.962 | 6.067 | 0.446 | 6.033 | 0.301 | 0.023 |
| tumor | 228 | 5.64 | 8.669 | 6.81 | 0.796 | 6.88 | 0.549 | 0.036 |
| **GSE84005** | <0.001 | non-tumor | 38 | 7.429 | 8.923 | 8.317 | 0.353 | 8.302 | 0.322 | 0.052 |
| tumor | 38 | 8.165 | 10.722 | 9.339 | 0.495 | 9.333 | 0.535 | 0.087 |
| **GSE87630** | <0.001 | non-tumor | 30 | 7.767 | 8.904 | 8.193 | 0.576 | 8.211 | 0.337 | 0.062 |
| tumor | 64 | 8.077 | 10.532 | 9.342 | 0.621 | 9.341 | 0.455 | 0.057 |
| **GSE102079** | <0.001 | non-tumor | 105 | 4.739 | 7.212 | 5.548 | 0.453 | 5.542 | 0.376 | 0.037 |
| tumor | 152 | 5.295 | 8.184 | 6.316 | 0.73 | 6.359 | 0.541 | 0.044 |
| **GSE45267** | <0.001 | non-tumor | 39 | 4.213 | 6.23 | 4.867 | 0.491 | 4.941 | 0.401 | 0.064 |
| tumor | 48 | 4.979 | 8.245 | 6.116 | 1.214 | 6.224 | 0.775 | 0.112 |

**Notes:** **Nums,** numbers**; min. value,** minimum value; **max. value,** maximum value;**IQR,** interquartile range; **SD,** standard deviation; **SE,** Standard Error.

**Supplementary Table 2 |** Univariate and multivariate survival method (Disease-Specific Survival) of prognostic covariates in patients with hepatocellular carcinoma.

| **Characteristics** | **Total(N)** | **Univariate analysis** | |  | **Multivariate analysis** | |
| --- | --- | --- | --- | --- | --- | --- |
| **Hazard ratio (95% CI)** | **P value** | **Hazard ratio (95% CI)** | **P value** |
| **T stage** | 362 |  |  |  |  |  |
| T1&T2 | 272 | Reference |  |  |  |  |
| T3&T4 | 90 | 3.639 (2.328-5.688) | **<0.001***** |  | 10.207 (0.561-185.592) | 0.116 |
| N **stage** | 253 |  |  |  |  |  |
| N0 | 249 | Reference |  |  |  |  |
| N1 | 4 | 3.612 (0.870-14.991) | 0.077 |  | 6.204 (0.753-51.139) | 0.090 |
| **M stage** | 268 |  |  |  |  |  |
| M0 | 265 | Reference |  |  |  |  |
| M1 | 3 | 5.166 (1.246-21.430) | **0.024*** |  | 2.067 (0.468-9.138) | 0.338 |
| **Gender** | 365 |  |  |  |  |  |
| Female | 118 | Reference |  |  |  |  |
| Male | 247 | 0.813 (0.516-1.281) | 0.373 |  |  |  |
| **Age** | 365 |  |  |  |  |  |
| <=60 | 174 | Reference |  |  |  |  |
| >60 | 191 | 0.846 (0.543-1.317) | 0.458 |  |  |  |
| **Race** | 353 |  |  |  |  |  |
| Asian | 156 | Reference |  |  |  |  |
| Black or African  American&White | 197 | 1.500 (0.927-2.427) | 0.098 |  | 0.894 (0.463-1.725) | 0.738 |
| **Pathologic stage** | 341 |  |  |  |  |  |
| Stage I&Stage II | 254 | Reference |  |  |  |  |
| Stage III&Stage IV | 87 | 3.803 (2.342-6.176) | **<0.001***** |  | 0.350 (0.017-7.054) | 0.493 |
| **Histologic grade** | 360 |  |  |  |  |  |
| G1&G2 | 227 | Reference |  |  |  |  |
| G4&G3 | 133 | 1.086 (0.683-1.728) | 0.726 |  |  |  |
| **Vascular invasion** | 309 |  |  |  |  |  |
| No | 204 | Reference |  |  |  |  |
| Yes | 105 | 1.277 (0.707-2.306) | 0.418 |  |  |  |
| **NABP2** | 365 |  |  |  |  |  |
| Low | 183 | Reference |  |  |  |  |
| High | 182 | 2.321 (1.468-3.671) | **<0.001***** |  | 2.648 (1.378-5.089) | **0.003**** |

**Notes:** **p* < 0.05; ***p* < 0.01; ****p* < 0.001.

**Abbreviations: N,** numbers**; 95% CI,** 95% confidence interval.

**Supplementary Table 3 |** Thetop 100differentially expressed genes(DEGs) between NABP2-high and NABP2-Low expression groups. (Adjusted p-value <0.05 and absolute Log2-fold change>1.0)

| **Gene symbol** | **logFC** | **pValue** |  | **Gene symbol** | **logFC** | **pValue** |
| --- | --- | --- | --- | --- | --- | --- |
| CPA2 | 8.80103 | 1.80E-08 |  | SCNN1G | -5.23857 | 0.027103 |
| PRSS2 | 6.828272 | 0.000547 |  | CRTAC1 | -4.14697 | 0.030661 |
| KIRREL2 | 6.78947 | 1.88E-05 |  | AC022601.1 | -2.92316 | 1.28E-08 |
| RTL1 | 6.422515 | 0.001973 |  | LINC01488 | -2.48523 | 7.10E-06 |
| FABP7 | 6.414687 | 0.018474 |  | BMP10 | -2.46619 | 0.000262 |
| CTRB1 | 5.678074 | 6.35E-06 |  | NOS1 | -2.40321 | 0.021306 |
| MUCL1 | 5.576613 | 0.014558 |  | SAA2 | -2.12069 | 0.023741 |
| DMBT1 | 5.564095 | 0.005745 |  | CLEC4M | -2.08499 | 0.012743 |
| CRYBA4 | 5.513748 | 0.031287 |  | TMEM252 | -2.0114 | 4.52E-07 |
| AC090921.1 | 5.388643 | 2.70E-05 |  | PLN | -1.97426 | 0.003687 |
| IL11 | 4.70321 | 3.55E-05 |  | WSCD2 | -1.96903 | 0.000973 |
| TMEM132D-AS1 | 4.680164 | 3.27E-11 |  | GDF2 | -1.946 | 0.007416 |
| CD8B2 | 4.651881 | 0.000807 |  | CRHBP | -1.93095 | 6.70E-09 |
| MATN4 | 4.639116 | 0.000369 |  | IL1RL1 | -1.90735 | 2.59E-08 |
| AL121938.1 | 4.630513 | 0.000422 |  | AC079360.1 | -1.86437 | 2.16E-11 |
| AP001972.4 | 4.609072 | 3.15E-07 |  | AL139385.1 | -1.85921 | 2.89E-07 |
| HTR3A | 4.510964 | 0.000141 |  | AL161645.2 | -1.84524 | 1.02E-09 |
| SLC30A8 | 4.312445 | 1.38E-07 |  | HAMP | -1.80288 | 0.00428 |
| CHRNA1 | 4.291823 | 0.001148 |  | CD300LG | -1.73461 | 1.63E-14 |
| LINC02870 | 4.266795 | 2.80E-06 |  | AKAIN1 | -1.72623 | 5.71E-07 |
| AC024940.1 | 4.265869 | 1.32E-05 |  | SCARA5 | -1.71709 | 0.005969 |
| TKTL1 | 4.22026 | 0.020226 |  | UGT1A2P | -1.68467 | 1.72E-11 |
| CRYBB1 | 4.120946 | 2.92E-05 |  | TERB2 | -1.65781 | 1.35E-08 |
| CLEC2L | 4.114506 | 6.14E-10 |  | OGN | -1.65553 | 3.89E-05 |
| SLC6A14 | 4.010438 | 1.73E-07 |  | SLC4A1 | -1.64018 | 0.023337 |
| LINC02577 | 3.94607 | 7.01E-05 |  | CYP3A4 | -1.63649 | 1.17E-06 |
| BX537318.2 | 3.931299 | 0.000292 |  | SLC14A2 | -1.63537 | 0.008166 |
| ALDH3B2 | 3.925129 | 0.01284 |  | CFHR4 | -1.62412 | 4.27E-22 |
| LHFPL3 | 3.90888 | 1.55E-10 |  | CYP1A2 | -1.61368 | 2.45E-05 |
| AL451069.3 | 3.895665 | 6.57E-08 |  | COLEC10 | -1.61164 | 0.000227 |
| LAMP5 | 3.885667 | 3.18E-05 |  | HEMGN | -1.59859 | 0.009055 |
| PPP1R14C | 3.874742 | 8.37E-05 |  | STEAP4 | -1.59558 | 8.77E-14 |
| TUBA3C | 3.865014 | 1.03E-08 |  | MT1X | -1.59283 | 0.000355 |
| LINC01036 | 3.858326 | 1.18E-10 |  | MT2P1 | -1.55396 | 0.001597 |
| CPNE6 | 3.857015 | 0.016006 |  | SLCO1B7 | -1.55364 | 1.03E-08 |
| ABCA12 | 3.812209 | 3.13E-05 |  | RGSL1 | -1.55217 | 0.000106 |
| CHGA | 3.792425 | 0.000948 |  | SLCO1B3-SLCO1B7 | -1.55158 | 7.43E-07 |
| CAMKV | 3.674928 | 0.008445 |  | AC092384.2 | -1.54266 | 1.83E-08 |
| VCX3A | 3.666742 | 2.07E-07 |  | AP003555.2 | -1.53229 | 1.31E-07 |
| LINC00958 | 3.629483 | 7.97E-05 |  | SLC25A47 | -1.52708 | 1.04E-07 |
| SYT8 | 3.601735 | 0.000274 |  | AL390242.1 | -1.5241 | 0.01099 |
| LGALS12 | 3.596903 | 0.000292 |  | MTCYBP35 | -1.52373 | 0.003245 |
| GRM3 | 3.589948 | 7.38E-05 |  | CYP26A1 | -1.52007 | 3.85E-05 |
| OLFM4 | 3.578138 | 0.002958 |  | SLC26A3 | -1.51802 | 0.019336 |
| NKAIN4 | 3.57367 | 0.000107 |  | AC010175.1 | -1.49066 | 0.002335 |
| TRIM72 | 3.56808 | 2.33E-10 |  | ACER1 | -1.48461 | 0.026089 |
| PKIA-AS1 | 3.552295 | 3.13E-05 |  | KCNU1 | -1.46894 | 0.003635 |
| TDRD5 | 3.513484 | 0.000627 |  | SAA1 | -1.45511 | 0.024717 |
| SUN3 | 3.501746 | 1.95E-08 |  | Z97192.4 | -1.45506 | 0.020442 |
| DLL3 | 3.479817 | 2.38E-07 |  | CTH | -1.45142 | 4.29E-09 |

**Abbreviations: logFC,** log2- fold change.
